# Supplementary material for: OTUB2 contributes to vascular calcification in chronic kidney disease via the YAP-mediated transcription of PFKFB3
Source: PubMed Central journal article supplement (PMC11700865; doi:10.7150/thno.98660), 2025-01-01
Supplement: thnov15p1185s1.pdf [file thnov15p1185s1.pdf]

**Title page**

**OTUB2 contributes to vascular calcification in chronic kidney disease via the YAP-mediated transcription of PFKFB3**

Yalan Li<sup>1</sup>, Xiaoyue Chen<sup>1</sup>, Xueqiang Xu<sup>1</sup>, Cheng Chen<sup>2</sup>, Min Min<sup>1</sup>, Dongmei Liang<sup>1</sup>, Jiafa Ren<sup>1</sup>,  
Huijuan Mao<sup>1</sup>

Author Affiliations: 1. Department of Nephrology, Jiangsu Province Hospital, The First Affiliated Hospital of Nanjing Medical University, Nanjing Medical University, 300 Guangzhou Road, Nanjing 210029, China. 2. Department of Medical Science, Yangzhou Polytechnic College, 458 West Wenchang Road, Yangzhou 225009, China.

Corresponding Authors: Huijuan Mao, MD, PhD, Department of Nephrology, Jiangsu Province Hospital, The First Affiliated Hospital of Nanjing Medical University, Nanjing Medical University, 300 Guangzhou Road, Nanjing 210029, China; Telephone number: +86-13851746819; E-mail: maohuijuan72@njmu.edu.cn; Jiafa Ren, PhD, Department of Nephrology, Jiangsu Province Hospital, The First Affiliated Hospital of Nanjing Medical University, Nanjing Medical University, 300 Guangzhou Road, Nanjing 210029, China; Telephone number: +86-13952012989; E-mail: jfren@njmu.edu.cn.

Category: Original Article

## Supplemental figures

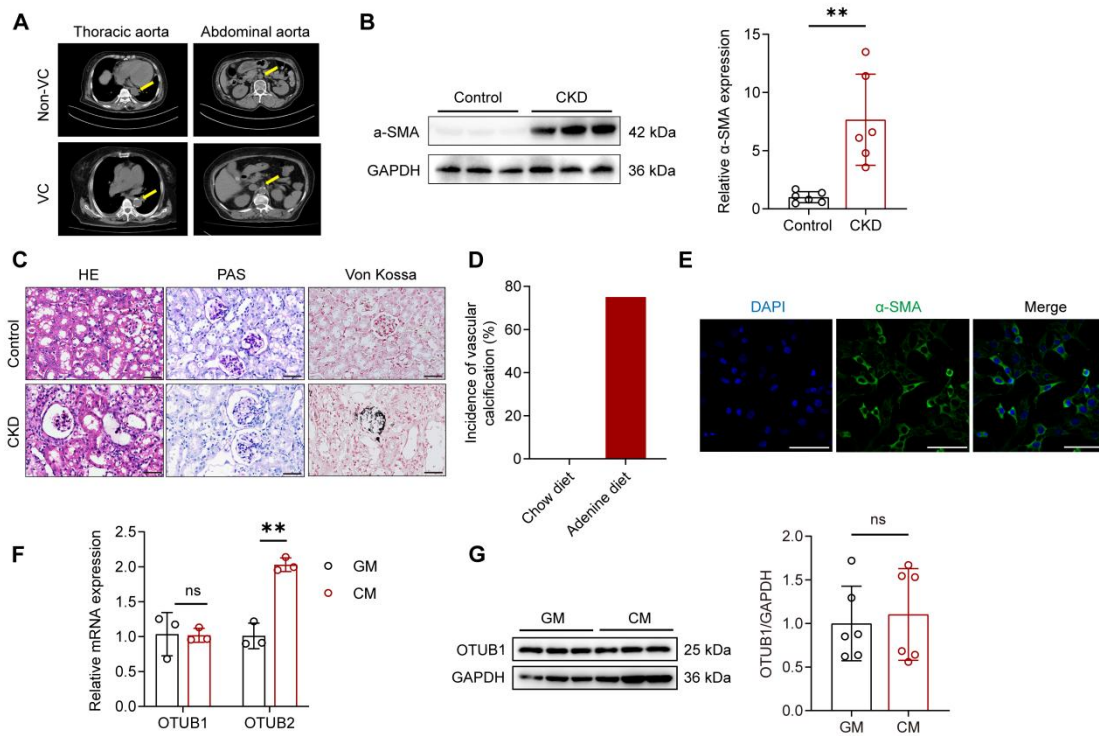

**Figure S1. OTUB2 expression is upregulated during VC.** (A) Representative images of MDCT scans of thoracic aorta and abdominal aorta of CKD patients with or without VC. (B) Western blot analysis of  $\alpha$ -SMA expression in kidneys from the control and CKD groups.  $n = 6$  per group. (C) Representative images of HE, PAS, and Von Kossa staining of kidneys from the control and CKD groups. Scale bars, 50  $\mu\text{m}$ . (D) The incidence of vascular calcification in mice fed with a chow or adenine diet. (E) The primary cells isolated from mouse aorta were identified by VSMC marker ( $\alpha$ -SMA) in immunofluorescence staining. Scale bars, 100  $\mu\text{m}$ . (F) RT-qPCR analysis of OTUB1 and OTUB2 mRNA expression in VSMCs treated with GM or CM.  $n = 3$  per group. (G) Immunoblots and quantification of OTUB1 in VSMCs treated with GM or CM.  $n = 6$  per group. Statistical significance was assessed using two-tailed t-test (B, F, G). All values are presented as mean  $\pm$  SD.  $**P < 0.01$ .

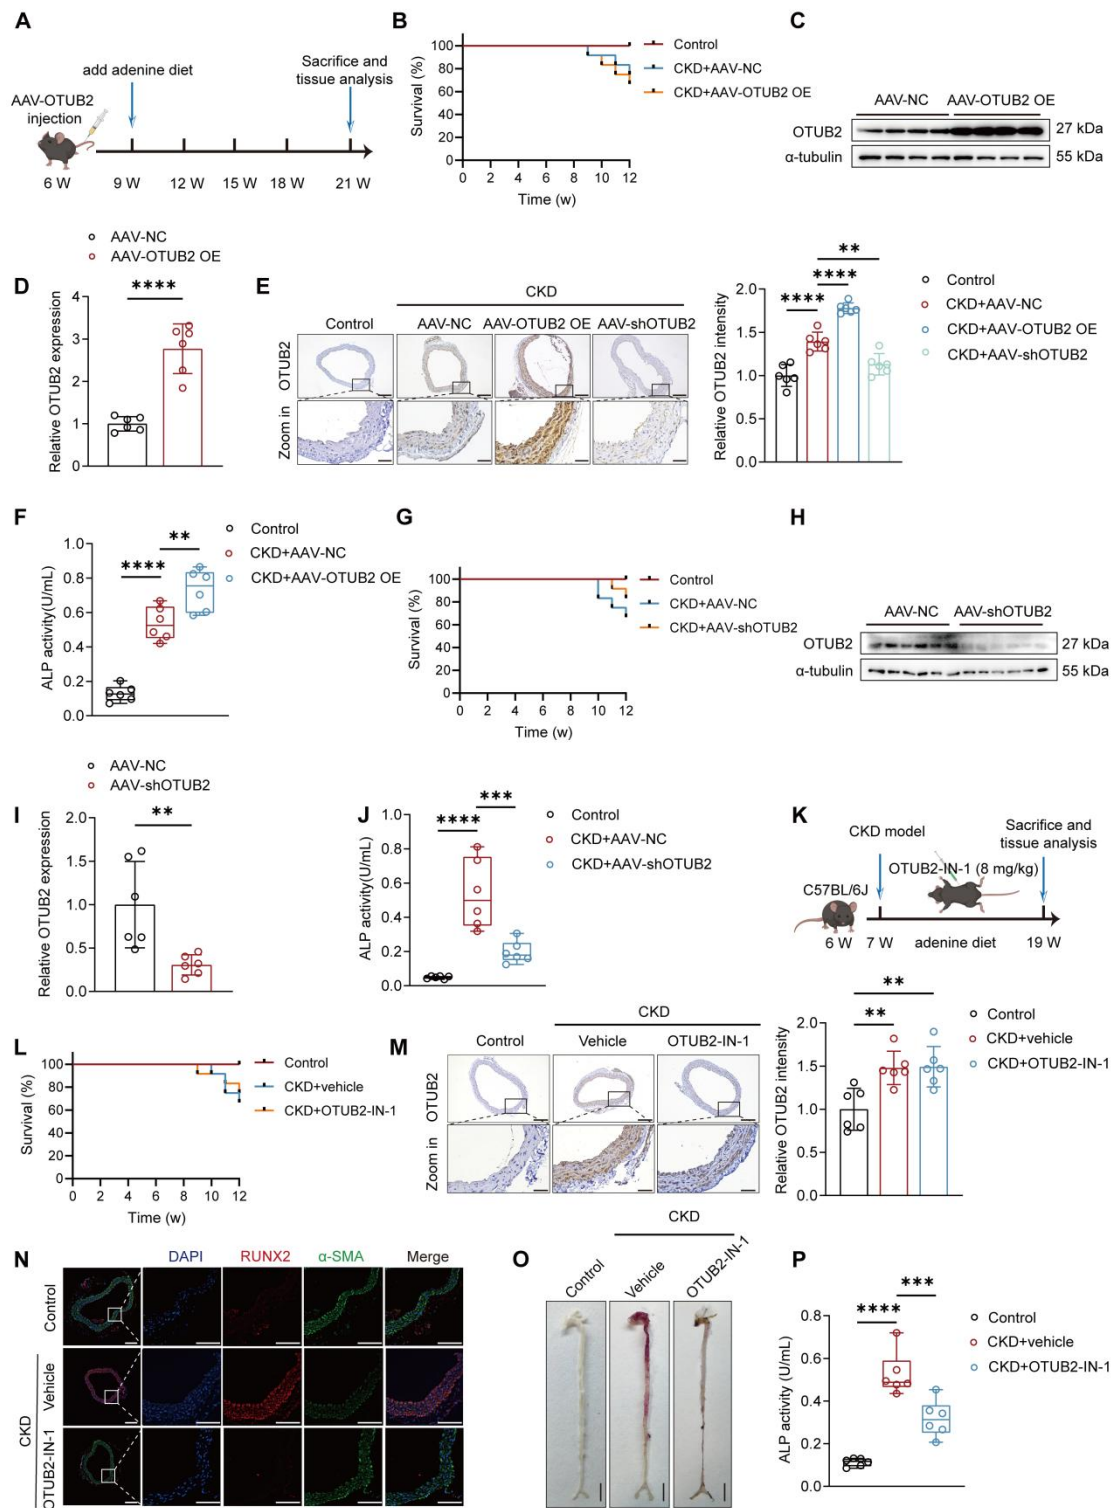

**Figure S2. OTUB2 accelerates the development of VC.** (A) A schematic representation showing that mice received AAV-NC, AAV-OTUB2 OE and AAV-shOTUB2 via tail vein injection. Mouse aortas were collected 12 weeks after adenine diet. (B) The survival curves of mice in each group. (C) Western blot and quantification (D) analysis identifying the OTUB2 overexpression in aortas. n = 6 per group.

(E) Representative images of immunohistochemical staining for OTUB2 to validate overexpression and knockdown efficiency. Scale bars, 200  $\mu\text{m}$  (upper panels), 50  $\mu\text{m}$  (lower panels).  $n = 6$  per group.

(F) ALP activity assay.  $n = 6$  per group. (G) The survival curves of mice in each group. (H) Western blot and quantification (I) analysis identifying the OTUB2 deficiency in aortas.  $n = 6$  per group. (J) ALP activity assay.  $n = 6$  per group. (K) A schematic representation showing that mice received OTUB2-IN-1 via intraperitoneal injection. (L) The survival curves of mice in each group. (M) Representative images of immunohistochemical staining for OTUB2. Scale bars, 200  $\mu\text{m}$  (upper panels), 50  $\mu\text{m}$  (lower panels).  $n = 6$  per group. (N) Representative images of immunofluorescence staining for RUNX2 and  $\alpha$ -SMA in aortas from the different experimental groups. Scale bars, 200  $\mu\text{m}$  (left panels), 100  $\mu\text{m}$  (right panels). (O) Representative images of Alizarin red staining of whole aortas from different experimental groups. Scale bars, 5 mm. (P) ALP activity assay.  $n = 6$  per group.

Statistical significance was assessed using two-tailed t-test (D, I) and one-way ANOVA followed by Dunnett's test (E, F, J, M, P). All values are presented as mean  $\pm$  SD.  $*P < 0.05$ ,  $**P < 0.01$ ,  $***P < 0.001$ .

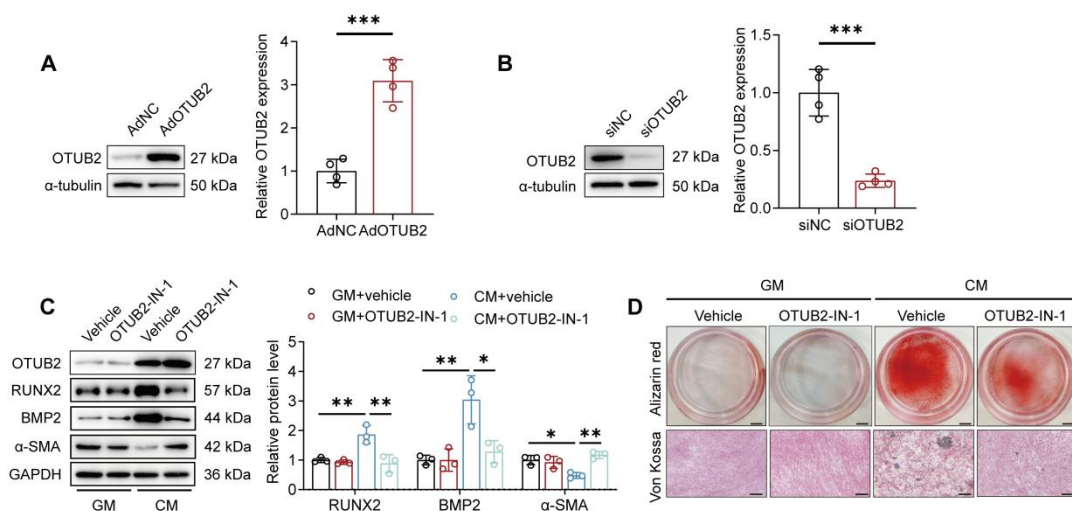

**Supplemental Figure S3. OTUB2 regulates osteogenic differentiation of VSMCs.** (A) Western blot

analysis identifying the OTUB2 overexpression in VSMCs. *n* = 4 per group. **(B)** Western blot analysis identifying the OTUB2 knockdown in VSMCs. *n* = 4 per group. **(C)** Western blot analysis of OTUB2, RUNX2, BMP2, and  $\alpha$ -SMA expression in VSMCs with OTUB2 inhibition by OTUB2-IN-1. *n* = 3 per group. **(D)** Representative images of Alizarin red and Von Kossa staining of VSMCs after OTUB2-IN-1 treatment (10  $\mu$ M) and CM exposure for another 7 days. Scale bars, 5 mm (upper panels), 100  $\mu$ m (lower panels). Statistical significance was assessed using two-tailed t-test (A, B) and one-way ANOVA followed by Dunnett's test (C). All values are presented as mean  $\pm$  SD. \**P* < 0.05, \*\**P* < 0.01, \*\*\**P* < 0.001.

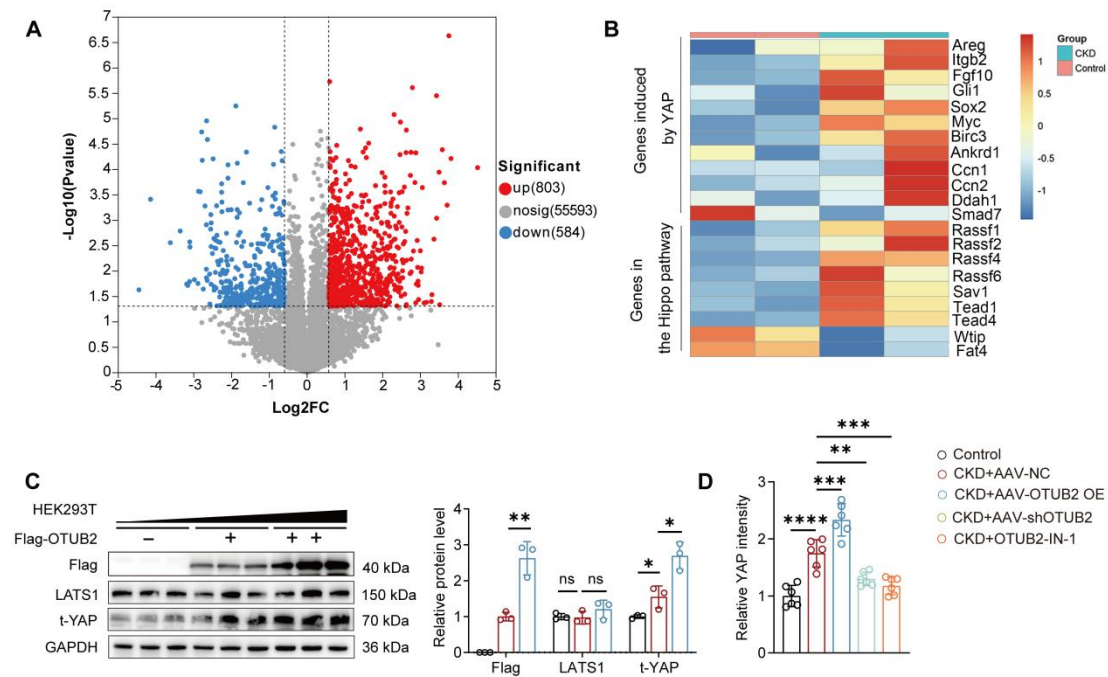

**Supplemental Figure S4. OTUB2 activates YAP in VSMCs.** **(A)** Volcano map of RNA-seq data from VSMCs treated with control adenoviruses or adenoviruses overexpressing OTUB2. **(B)** Heatmap of differentially expressed YAP targeted genes in RNA-seq data from the GSE159832 dataset. **(C)** Western blot analysis and quantification of YAP and LATS1 levels in HEK293T cells. *n* = 3 per group. **(D)** Quantification of YAP protein levels in aortic sections from the indicated groups. *n* = 6 per group. Statistical significance was assessed using one-way ANOVA followed by Dunnett's test (C, D). All

values are presented as mean  $\pm$  SD. \* $P < 0.05$ , \*\* $P < 0.01$ , \*\*\* $P < 0.001$ , and \*\*\*\* $P < 0.0001$ .

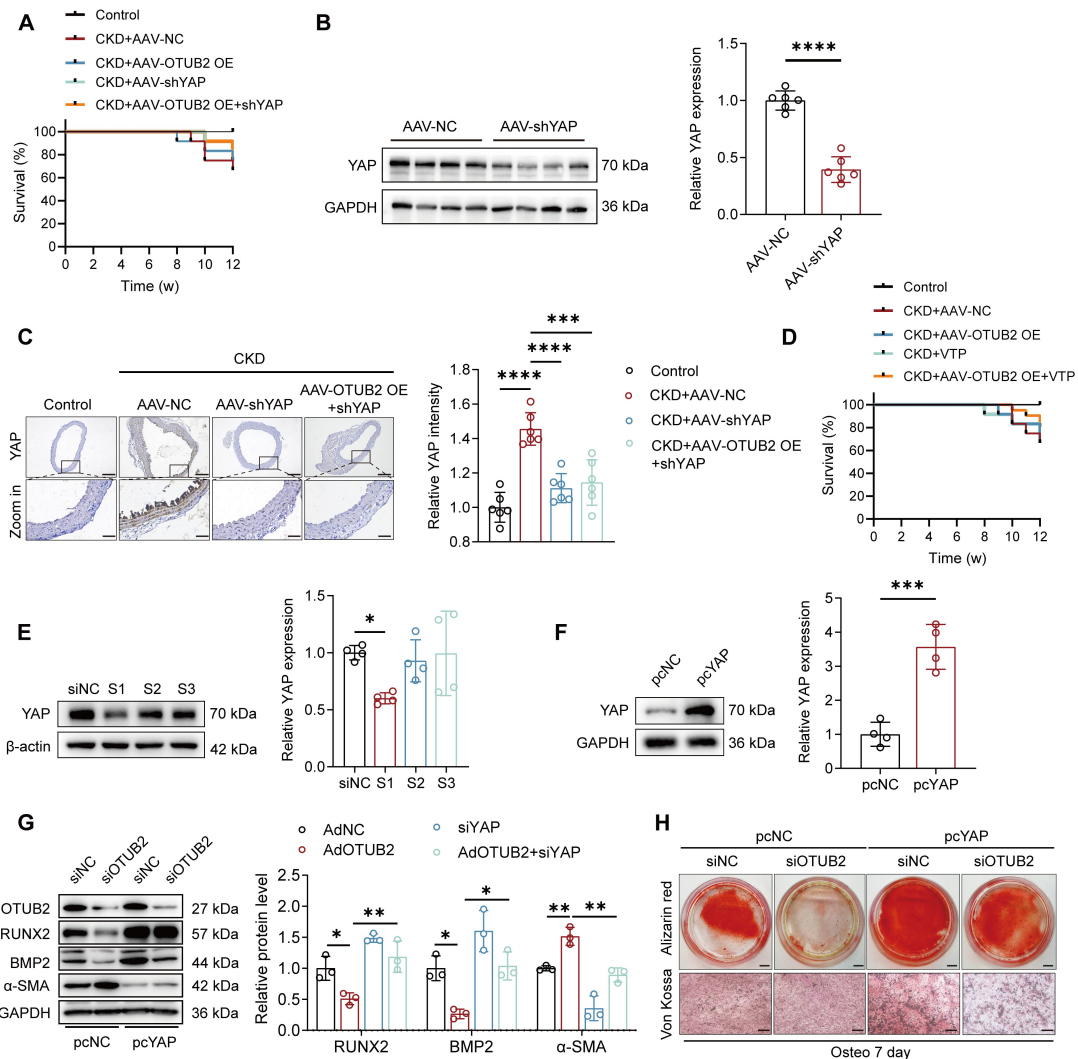

**Supplemental Figure S5. Knockdown or inhibition of YAP partially suppresses VC promoted by OTUB2 overexpression.** (A) The survival curves of mice in each group. (B) YAP knockdown efficiency was confirmed by Western blot analysis.  $n = 6$  per group. (C) YAP knockdown efficiency was confirmed by immunohistochemical staining. Scale bars, 200  $\mu\text{m}$  (upper panels) and 50  $\mu\text{m}$  (lower panels).  $n = 6$  per group. (D) The survival curves of mice in each group. (E) Western blot analysis identifying the YAP knockdown in VSMCs.  $n = 4$  per group. (F) Western blot analysis identifying the YAP overexpression in VSMCs.  $n = 4$  per group. (G) Western blot analysis of OTUB2, RUNX2, BMP2, and  $\alpha$ -SMA expression in VSMCs.  $n = 3$  per group. (H) Representative images of Alizarin red and Von

Kossa staining of VSMCs after the indicated treatments and CM exposure for another 7 days. Scale bars, 5 mm (upper panels) and 100  $\mu$ m (lower panels). Statistical significance was assessed using two-tailed t-test (B, F) and one-way ANOVA followed by Dunnett's test (C, E, G). All values are presented as mean  $\pm$  SD. \* $P$  < 0.05, \*\* $P$  < 0.01, \*\*\* $P$  < 0.001, and \*\*\*\* $P$  < 0.0001.

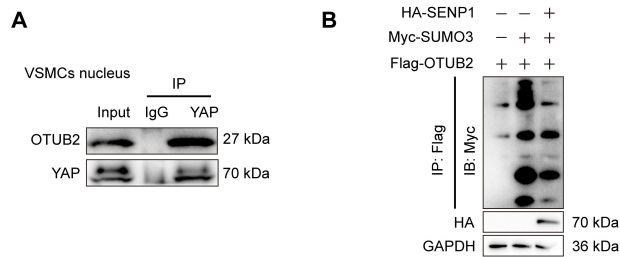

**Supplemental Figure S6. OTUB2 interacts with and stabilizes YAP.** (A) Nuclear lysates of VSMCs were immunoprecipitated using an anti-YAP antibody. (B) Western blot analysis of cell lysates and anti-Flag immunoprecipitates of cells co-transfected with Myc-SUMO3, Flag-OTUB2, and HA-SEN1.

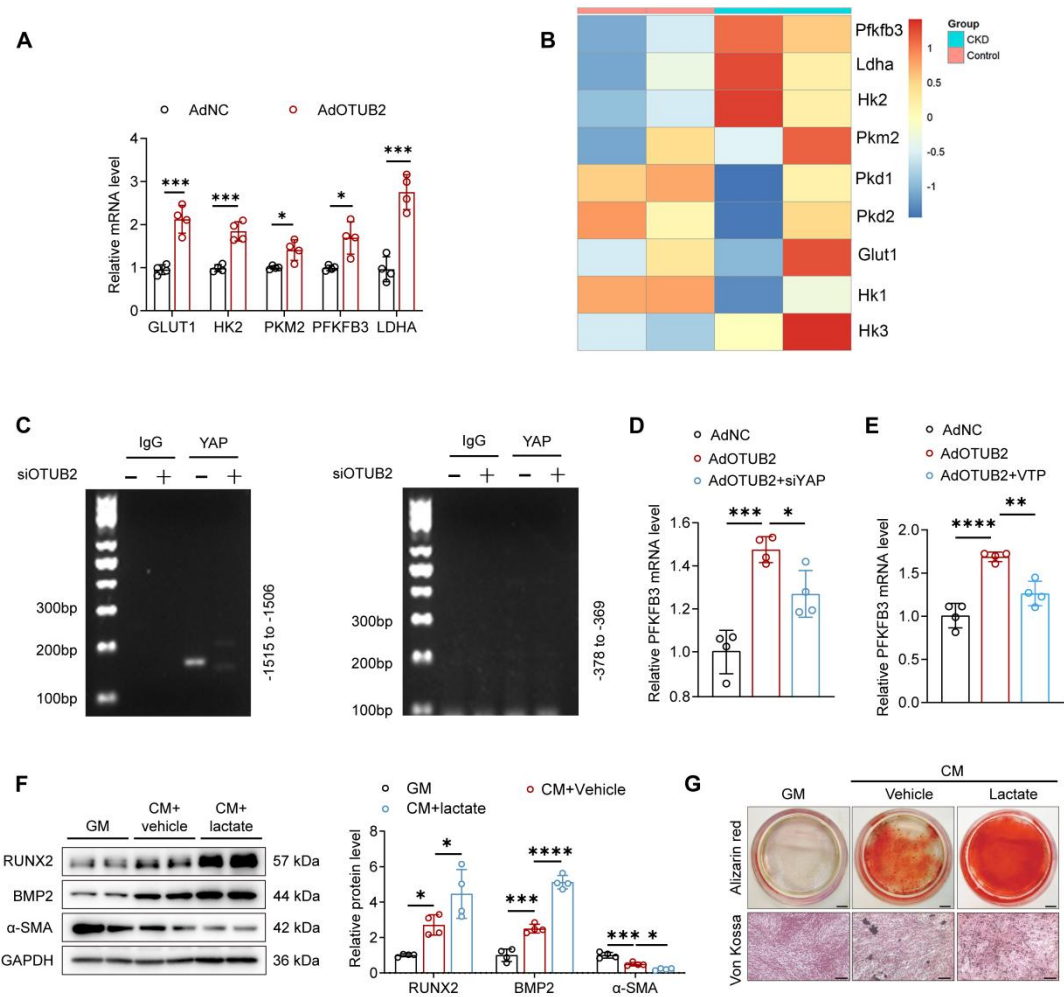

**Supplemental Figure S7. OTUB2 facilitates PFKFB3 transcription through YAP.** (A) RT-qPCR analysis of glycolysis-related enzymes mRNA levels after OTUB2 overexpression. n = 4 per group. (B) Heatmap of differentially expressed glycolytic enzymes in RNA-seq data from the GSE159832 dataset. (C) Representative agarose gel results for CUT&RUN-qPCR assays. (D-E) RT-qPCR analysis of PFKFB3 mRNA levels after the indicated treatments. n = 4 per group. (F) Western blot analysis and quantification of RUNX2, BMP2, and  $\alpha$ -SMA protein expression in VSMCs after lactate treatment. n = 4 per group. (G) Representative images of Alizarin red and Von Kossa staining of VSMCs after the indicated treatments and CM exposure for another 7 days. Scale bars, 5 mm (upper panels), 100  $\mu$ m (lower panels). Statistical significance was assessed using t-test (A) and one-way ANOVA followed by



Dunnett's test (D, E, F). All values are presented as mean  $\pm$  SD. \* $P < 0.05$ , \*\* $P < 0.01$ , \*\*\* $P < 0.001$ , and \*\*\*\* $P < 0.0001$ .

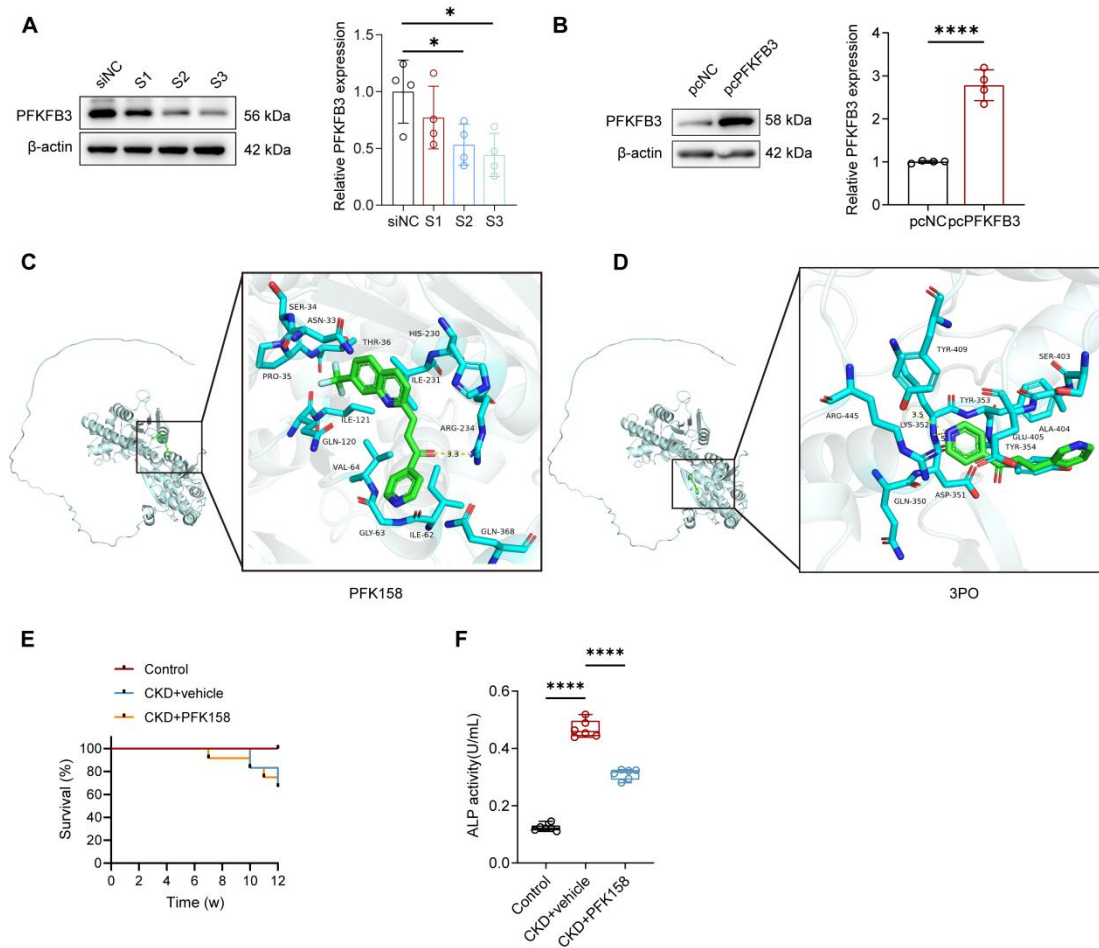

**Supplemental Figure S8. OTUB2 exerts procalcific effects through PFKFB3 upregulation. (A)**

Western blot analysis identifying the PFKFB3 depletion in VSMCs. n = 4 per group. **(B)** Western blot

analysis identifying the PFKFB3 overexpression in VSMCs. n = 4 per group. **(C)** Molecular docking

analysis of PFK158 with PFKFB3. **(D)** Molecular docking analysis of 3PO with PFKFB3. **(E)** The

survival curves of mice in each group. **(F)** ALP activity assay. n = 6 per group. Statistical significance

was assessed using t-test (B) and one-way ANOVA followed by Dunnett's test (A, F). All values are

presented as mean  $\pm$  SD. \* $P < 0.05$ , \*\* $P < 0.01$ , \*\*\* $P < 0.001$ , and \*\*\*\* $P < 0.0001$ .

## Supplemental tables

**Table S1. The relative siRNAs in this work**

| Gene name                 | Relative sequences      |
|---------------------------|-------------------------|
| OTUB2 siRNA S1 sense      | GAGAGAUCUCAAGUUCAATT    |
| OTUB2 siRNA S1 antisense  | UUGAACUUGAGGAUCUCUCTT   |
| OTUB2 siRNA S2 sense      | CGGUUUAUCUGCUCUAUAATT   |
| OTUB2 siRNA S2 antisense  | UUCAUCAGAAGAACCAGCCTT   |
| OTUB2 siRNA S3 sense      | CAGAGUUCAACAAACUCAATT   |
| OTUB2 siRNA S3 antisense  | UUGAGUUUGUUGAACUCUGTT   |
| YAP siRNA S1 sense        | CGGUUGAAACAACAGGAAUUATT |
| YAP siRNA S1 antisense    | UAAUUCCUGUUGUUCAACCGTT  |
| YAP siRNA S2 sense        | UGAGAACAAUGACAACCAAUATT |
| YAP siRNA S2 antisense    | UAUUGGUUGUCAUUGUUCUCATT |
| YAP siRNA S3 sense        | GAAGCGCUGAGUCCGAAAUCTT  |
| YAP siRNA S3 antisense    | GAUUUCGGAACUCAGCGCUUCTT |
| PFKFB3 siRNA S1 sense     | CCGCUCAUGAGACGCAAUATT   |
| PFKFB3 siRNA S1 antisense | UAUUGCGUCUCAUGAGCGGTT   |
| PFKFB3 siRNA S2 sense     | GGAAUUAGAGCGCCAAGAGAATT |
| PFKFB3 siRNA S2 antisense | UUCUCUUGGCGCUCUAAUUCCTT |
| PFKFB3 siRNA S3 sense     | GCCCUGAGCAAGUUCGUAGAATT |
| PFKFB3 siRNA S3 antisense | UUCUACGAACUUGCUCAGGGCTT |

**Table S2. The antibodies used in this study**

| Antibodies                | Item number              | Usage                         |
|---------------------------|--------------------------|-------------------------------|
| Anti-Runx2                | Abcam # ab236639         | WB 1:1000; IHC/IF 1:200       |
| Anti-BMP2                 | Immunoway # YT5651       | WB 1:1000; IHC/IF 1:200       |
| Anti- $\alpha$ -SMA       | Abcam # ab7817           | WB 1:1000; IHC/IF 1:200       |
| Anti-OTUB2                | Immunoway # YT3475       | WB 1:1000; IHC/IF 1:200       |
| Anti-YAP                  | Proteintech # 13584-1-AP | WB 1:5000; IHC/IF 1:200       |
| Anti-active YAP           | Abcam # ab205270         | WB 1:1000                     |
| Anti-PFKFB3               | Abcam # ab181861         | WB 1:1000; IHC/IF 1:100       |
| Anti-Ub K48               | Abcam # ab140601         | WB 1:1000                     |
| Anti-Ub K63               | Abcam # ab179434         | WB 1:1000                     |
| Anti-Flag                 | Abmart # M20008          | WB 1:5000                     |
| Anti-HA                   | Abmart # M20013          | WB 1:5000                     |
| Anti-GAPDH                | Proteintech # 10494-1-AP | WB 1:5000                     |
| Anti- $\beta$ -actin      | Proteintech # 66009-1-Ig | WB 1:5000                     |
| Anti-Histone3             | Proteintech # 17168-1-AP | WB 1:5000                     |
| Anti- $\alpha$ -tubulin   | Proteintech # 11224-1-AP | WB 1:5000                     |
| Anti-LATS1                | Abcam # ab243656         | WB 1:1000                     |
| Anti-mouse-Alexa Flu-488  | Abways # ab0142          | IF: 1:200                     |
| Anti-rabbit-Alexa Flu-594 | Abways # ab0151          | IF: 1:200                     |
| IgG                       | Proteintech # 30000-0-AP | IP: 2 $\mu$ l for 1mg protein |

**Table S3. The primers of relative genes in this work**

| Gene Name               | Primers                  |
|-------------------------|--------------------------|
| mGAPDH Forward(5'- 3')  | CAGTGGCAAAGTGGAGATTGTTG  |
| mGAPDH Reverse(5'- 3')  | TCGCTCCTGGAAGATGGTGAT    |
| mOTUB2 Forward(5'- 3')  | AACCGAGCTGACTTCTTCCGAC   |
| mOTUB2 Reverse(5'- 3')  | GCAGAGCAATGTTGAGTGCCTG   |
| mOTUB1 Forward(5'- 3')  | GCTGGAACTCTCAGTCTGTAC    |
| mOTUB1 Reverse(5'- 3')  | CGGTAGAAGCAGTTGCCATCAG   |
| mYAP Forward(5'- 3')    | CCAGACGACTTCCTCAACAGTG   |
| mYAP Reverse(5'- 3')    | GCATCTCCTTCCAGTGTGCCAA   |
| mCTGF Forward(5'- 3')   | TGCGAAGCTGACCTGGAGGAAA   |
| mCTGF Reverse(5'- 3')   | CCGCAGAACTTAGCCCTGTATG   |
| mANKRD1 Forward(5'- 3') | GCTTAGAAGGACACTTGGCGATC  |
| mANKRD1 Reverse(5'- 3') | GACATCTGCGTTTCCTCCACGA   |
| mAREG Forward(5'- 3')   | GCAGATACATCGAGAACCTGGAG  |
| mAREG Reverse(5'- 3')   | CCTTGTCATCCTCGCTGTGAGT   |
| mGLUT1 Forward(5'- 3')  | GCTTCTCCAACCTGGACCTCAAAC |
| mGLUT1 Reverse(5'- 3')  | ACGAGGAGCACCGTGAAGATGA   |
| mHK2 Forward(5'- 3')    | CCCTGTGAAGATGTTGCCCACT   |
| mHK2 Reverse(5'- 3')    | CCTTCGCTTGCCATTACGCACG   |
| mLDHA Forward(5'- 3')   | ACGCAGACAAGGAGCAGTGGAA   |
| mLDHA Reverse(5'- 3')   | ATGCTCTCAGCCAAGTCTGCCA   |

|                            |                         |
|----------------------------|-------------------------|
| mPKM2 Forward(5' - 3')     | CAGAGAAGGTCTTCCTGGCTCA  |
| mPKM2 Reverse(5' - 3')     | GCCACATCACTGCCTTCAGCAC  |
| mPFKFB3 Forward(5' - 3')   | TCATCGAGTCGGTCTGTGACGA  |
| mPFKFB3 Reverse(5' - 3')   | CATGGCTTCTGCTGAGTTGCAG  |
| mβ- actin Forward(5' - 3') | CATTGCTGACAGGATGCAGAAGG |
| mβ- actin Reverse(5' - 3') | TGCTGGAAGGTGGACAGTGAGG  |

**Table S4. Baseline characteristics of the study patients with or without vascular calcification.**

| Characteristics                  | Non-calcification (n = 8) | Calcification (n = 8) | <i>P</i> value |
|----------------------------------|---------------------------|-----------------------|----------------|
| Age, years                       | 64.25±11.16               | 61.50±12.85           | 0.65           |
| Male, n (%)                      | 4 (50.00%)                | 7 (87.50%)            | 0.28           |
| SBP, mmHg                        | 150.90±24.29              | 131.80±10.25          | 0.06           |
| DBP, mmHg                        | 81.13±20.11               | 80.13±9.172           | 0.90           |
| Hemoglobin, g/L                  | 90.75±16.71               | 96.63±27.22           | 0.61           |
| eGFR, mL/min/1.73 m <sup>2</sup> | 6.56±3.16                 | 5.50 (4.00-10.10)     | 0.86           |
| BUN, mmol/L                      | 23.03±10.38               | 23.69±6.786           | 0.88           |
| CREA, μmol/L                     | 711.10±402.00             | 813.40±337.10         | 0.59           |
| Phosphate, mmol/L                | 1.53±0.46                 | 1.73±0.25             | 0.28           |
| Calcium, mmol/L                  | 2.29±0.22                 | 2.22±0.30             | 0.59           |
| Kalium, mmol/L                   | 4.16±0.61                 | 4.06±0.31             | 0.69           |
| Total cholesterol, mmol/L        | 3.18±0.73                 | 3.19±0.85             | 0.97           |
| Triglycerides, mmol/L            | 1.39 (0.71-3.15)          | 0.85 (0.75-2.51)      | 0.33           |

|                         |            |                     |      |
|-------------------------|------------|---------------------|------|
| HDL cholesterol, mmol/L | 0.95±0.51  | 0.89±0.16           | 0.78 |
| LDL cholesterol, mmol/L | 1.85±0.36  | 1.88±0.59           | 0.92 |
| ALB, g/L                | 36.91±3.36 | 33.49±6.71          | 0.22 |
| ALT, U/L                | 10.70±3.98 | 11.55 (7.75-13.63)  | 0.90 |
| AST, U/L                | 16.76±2.44 | 15.35 (11.53-20.38) | 0.49 |

Values are expressed as median (25th to 75th quartiles) or mean ± SD for continuous variables and n (%) for categorical variables, respectively. SBP, systolic blood pressure; DBP, diastolic blood pressure; eGFR, estimated glomerular filtration rate; BUN, blood urea nitrogen; CREA, creatinine; HDL, high-density lipoprotein; LDL, low-density lipoprotein. ALB, albumin; ALT, alanine transaminase; AST, aspartate aminotransferase.

**Table S5. Bodyweight and plasma biochemical parameters of adenine diet-induced CKD mice with OTUB2 deficiency or overexpression.**

| Parameters      | Control    | CKD+AAV-NC   | CKD+AAV-shOTUB2 | CKD+AAV-OTUB2 OE |
|-----------------|------------|--------------|-----------------|------------------|
| Body weight (g) | 28.71±1.30 | 14.01±1.68*  | 15.14±1.36*     | 14.95±0.83*      |
| Creatinine (μM) | 18.91±8.64 | 56.72±7.46*  | 63.49±18.30*    | 70.20±9.65*      |
| BUN (mM)        | 5.92±3.52  | 60.16±10.76* | 50.07±972*      | 51.97±10.42*     |
| Phosphorus (mM) | 2.95±0.50  | 6.16±0.86*   | 6.20±2.17*      | 6.54±1.67*       |
| Calcium (mM)    | 2.29±0.27  | 2.25±0.14    | 2.33±0.03       | 2.45±0.14        |

Statistical significance was assessed using one-way ANOVA followed by Dunnett's test. Values are means ± SD (n = 6 per group). \**P* < 0.05 vs. Control.

**Table S6. Bodyweight and plasma biochemical parameters of adenine diet-induced CKD mice treated with vehicle or OTUB2-IN-1.**

| Parameters      | Control    | CKD+vehicle  | CKD+OTUB2-IN-1 |
|-----------------|------------|--------------|----------------|
| Body weight (g) | 28.93±1.66 | 14.18±1.77*  | 14.27±1.81*    |
| Creatinine (μM) | 25.36±5.79 | 62.03±11.45* | 65.12±20.59*   |
| BUN (mM)        | 7.19±4.99  | 77.13±12.83* | 80.96±15.15*   |
| Phosphorus (mM) | 2.10±0.39  | 4.08±0.50*   | 3.50±1.08*     |
| Calcium (mM)    | 2.43±0.11  | 2.40±0.06    | 2.49±0.11      |

Statistical significance was assessed using one-way ANOVA followed by Dunnett's test. Values are means ± SD (n = 6 per group). \**P* < 0.05 vs. Control.

**Table S7. Bodyweight and plasma biochemical parameters of adenine diet-induced CKD mice with YAP deficiency or VTP treatment after OTUB2 overexpression.**

| Parameters      | Control    | CKD+        | CKD+AAV-     | CKD+         | CKD+AAV-OTUB | CKD+VTP      | CKD+AAV-     |
|-----------------|------------|-------------|--------------|--------------|--------------|--------------|--------------|
|                 |            | AAV-NC      | OTUB2 OE     | AAV-shYAP    | 2 OE+shYAP   |              | OTUB2 OE+VTP |
| Body weight (g) | 29.43±1.35 | 15.33±1.19* | 14.74±1.07*  | 14.97±0.97*  | 14.90±0.99*  | 14.70±1.13*  | 14.65±1.33*  |
| Creatinine (μM) | 21.15±3.89 | 53.41±6.50* | 52.70±8.31*  | 48.38±11.20* | 54.05±3.57*  | 55.66±6.94*  | 51.46±6.94*  |
| BUN (mM)        | 5.37±1.21  | 54.49±9.05* | 54.44±12.49* | 47.93±8.67*  | 47.92±15.82* | 55.39±15.78* | 55.96±15.17* |
| Phosphorus (mM) | 3.15±0.68  | 7.46±1.06*  | 8.18±1.32*   | 7.07±1.70*   | 8.10±1.57*   | 7.44±3.01*   | 7.50±1.91*   |

|                 |           |           |           |           |           |           |           |
|-----------------|-----------|-----------|-----------|-----------|-----------|-----------|-----------|
| Calcium<br>(mM) | 2.59±0.07 | 2.48±0.20 | 2.37±0.22 | 2.39±0.57 | 2.27±0.17 | 2.66±0.32 | 2.62±0.25 |
|-----------------|-----------|-----------|-----------|-----------|-----------|-----------|-----------|

Statistical significance was assessed using one-way ANOVA followed by Dunnett's test. Values are means ± SD (n = 6 per group). \**P* < 0.05 vs. Control.

**Table S8. Bodyweight and plasma biochemical parameters of adenine diet-induced CKD mice treated with vehicle or PFK158.**

| Parameters      | Control    | CKD+vehicle  | CKD+PFK158   |
|-----------------|------------|--------------|--------------|
| Body weight (g) | 29.33±1.21 | 14.87±1.04*  | 14.87±0.87*  |
| Creatinine (μM) | 23.82±5.70 | 62.46±14.17* | 51.43±4.43*  |
| BUN (mM)        | 18.41±3.57 | 88.28±8.98*  | 80.13±18.10* |
| Phosphorus (mM) | 3.52±0.48  | 5.41±0.28*   | 6.11±0.72*   |
| Calcium (mM)    | 2.20±0.20  | 2.11±0.19    | 2.28±0.21    |

Statistical significance was assessed using one-way ANOVA followed by Dunnett's test. Values are means ± SD (n = 6 per group). \**P* < 0.05 vs. Control.
